# Supplementary material
Source: publisher figshare collection journal article supplement (https://acs.figshare.com/ndownloader/files/8447114)
Supplement: Supplementary file 1 [file 8447114]

# Supporting Information

## **H<sub>2</sub>O<sub>2</sub> production in microbial electrochemical cells fed with primary sludge**

*Dongwon Ki<sup>\*,†</sup>, Sudeep C. Popat<sup>‡</sup>, Bruce E. Rittmann<sup>†</sup>, and César I. Torres<sup>†,§</sup>*

<sup>†</sup> Biodesign Swette Center for Environmental Biotechnology, Arizona State University,  
P.O. Box 875701, Tempe AZ 85287-5701, USA

<sup>‡</sup> Department of Environmental Engineering and Earth Sciences, Clemson University,  
USA

<sup>§</sup> School for Engineering of Matter Transport and Energy, Arizona State University, 501  
E. Tyler Mall ECG 301, Tempe, AZ 85287, USA

### **Corresponding Author**

\*(D. Ki) Phone: +1 480 727 0848; fax: +1 480 727 0889

Email: [dongwonk@asu.edu](mailto:dongwonk@asu.edu)

## **SUPPORTING INFORMATION**

8 pages including cover page

2 tables

6 figures

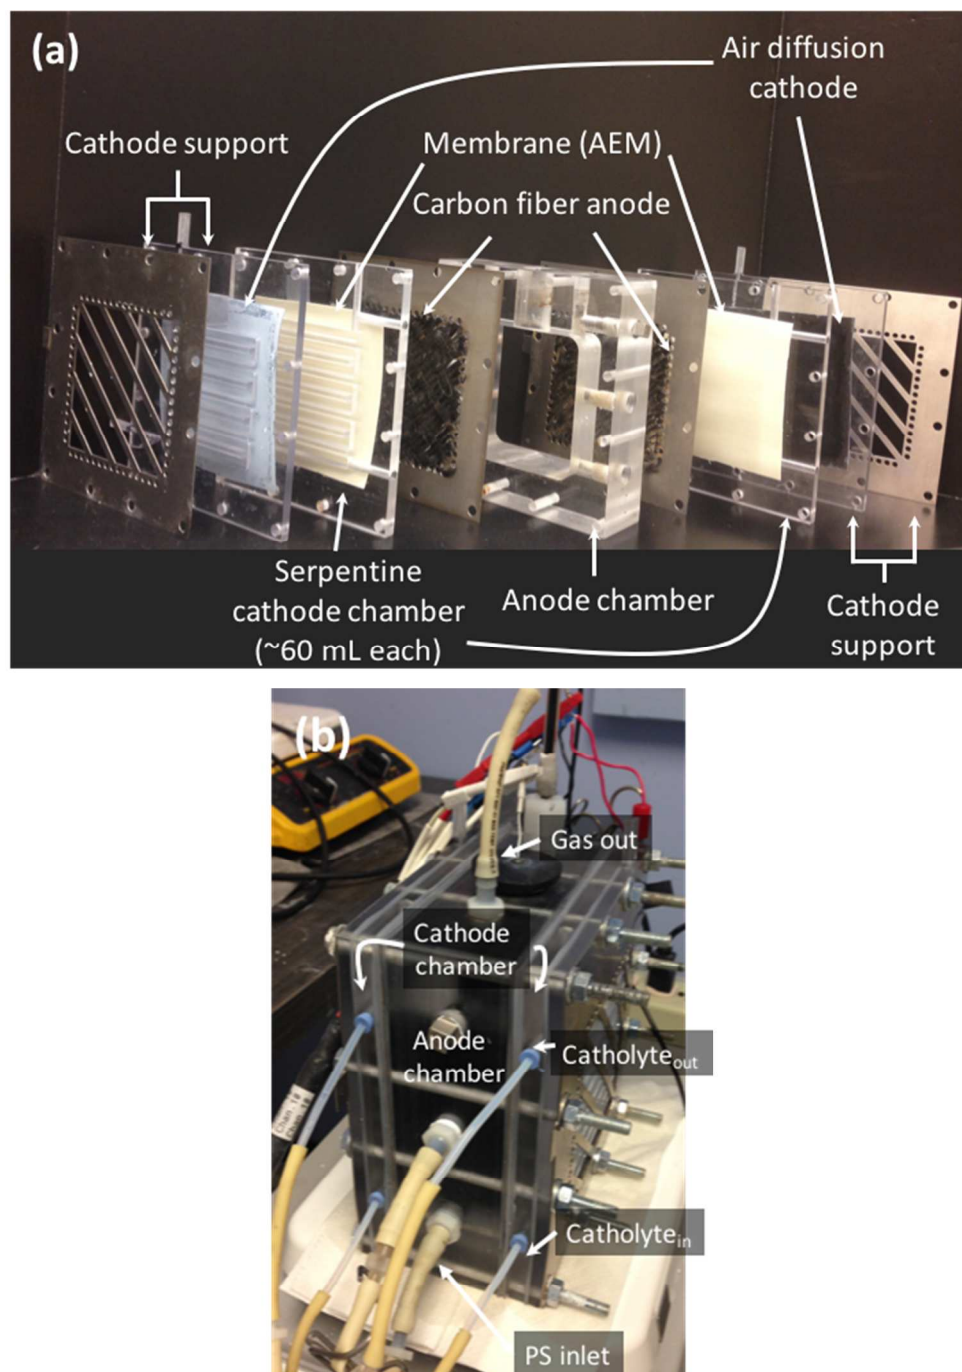

**Figure S1.** Microbial peroxide producing cell (MPPC) design. All of the reactor components (a) and the assembled system (b).

**Table S1.** Characteristics of PS influent and MEC and MPPC effluents for experiments with a 9-day HRT

|       | MEC                |                   | MPPC               |                   |
|-------|--------------------|-------------------|--------------------|-------------------|
|       | Influent           | Effluent          | Influent           | Effluent          |
| TCOD  | 7450 ( $\pm 330$ ) | 2860 ( $\pm 20$ ) | 7700 ( $\pm 90$ )  | 3940 ( $\pm 40$ ) |
| SSCOD | 370                | 280               | 420 ( $\pm 20$ )   | 340 ( $\pm 20$ )  |
| TSS   | 4260 ( $\pm 40$ )  | 1880 ( $\pm 20$ ) | 4590 ( $\pm 140$ ) | 2650 ( $\pm 70$ ) |
| VSS   | 3740 ( $\pm 20$ )  | 1680 ( $\pm 10$ ) | 3890 ( $\pm 130$ ) | 2210 ( $\pm 60$ ) |

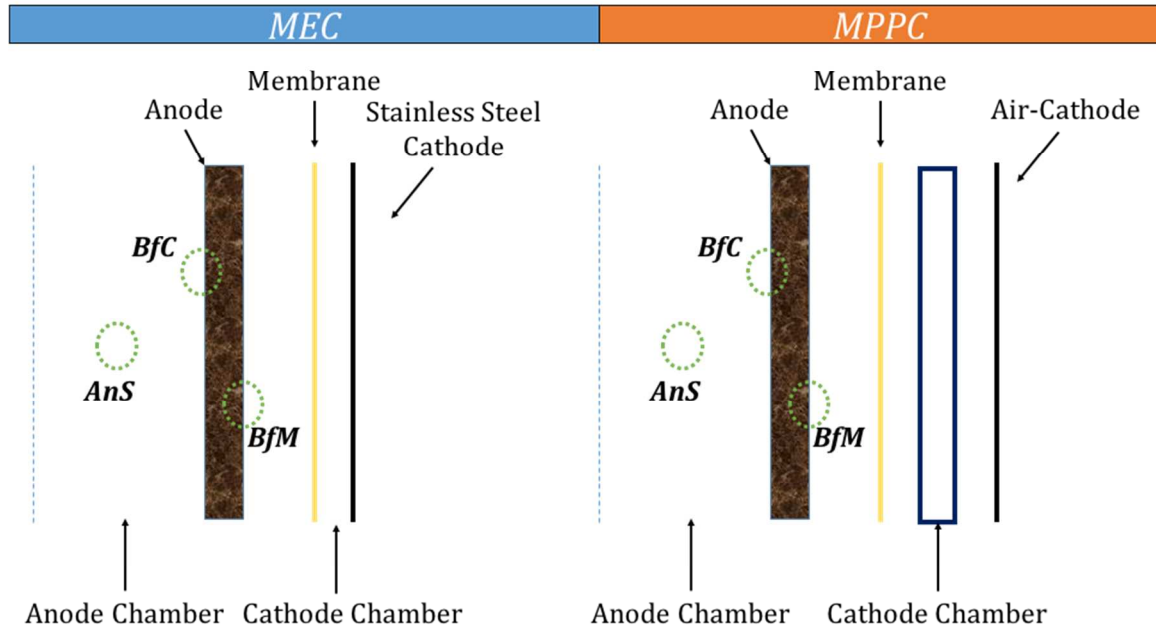

**Figure S2.** Schematic view for the sampling locations in the MEC and MPPC at the end of operation: anode suspension (AnS), biofilm of chamber side (BfC), and biofilm of membrane side (BfM).

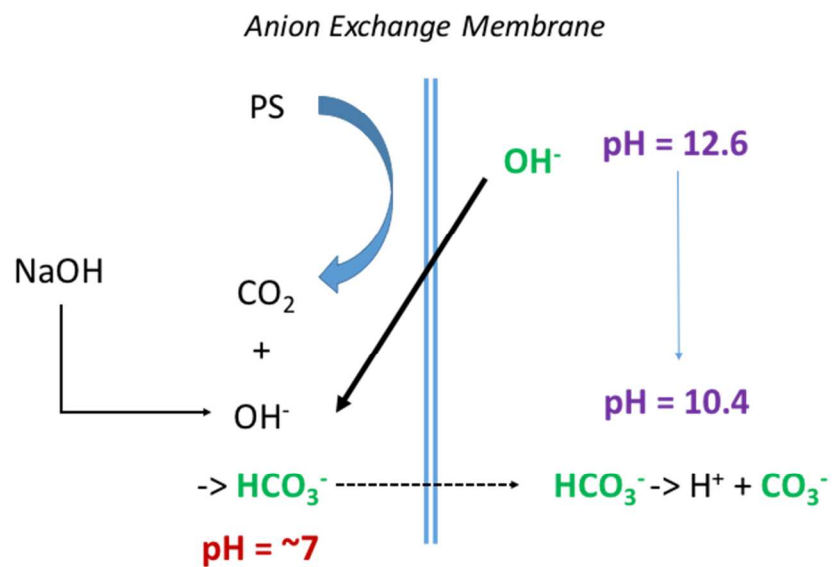

**Figure S3.** Possible mechanisms ion migration and diffusion across the anion exchange membrane between the anode and the cathode.

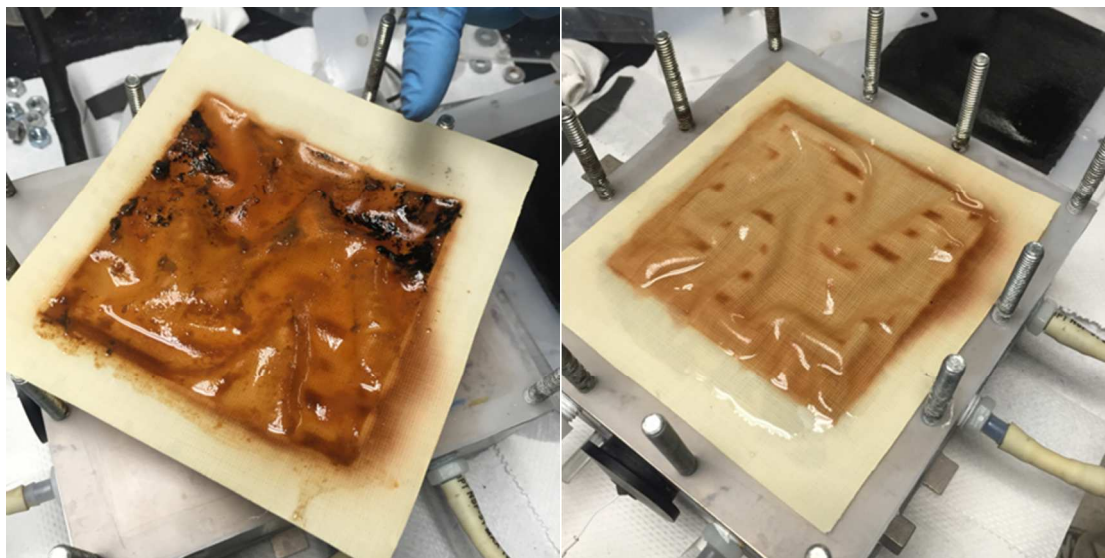

**Figure S4.** Anion exchange membrane used during MPPC fed with PS for 27 days. Left (anode side) and Right (cathode-chamber side).

### Abiotic $\text{H}_2\text{O}_2$ decay tests in different salt solutions

We performed  $\text{H}_2\text{O}_2$ -decay tests using 40 mL bottles in 100-mM solutions of sodium carbonate, sodium bicarbonate, and sodium hydroxide with  $\sim 2700 \text{ mg L}^{-1}$  of  $\text{H}_2\text{O}_2$ . Although pH was maintained stable during  $\sim 1$  day operation, the  $\text{H}_2\text{O}_2$  concentration in sodium carbonate decreased very rapidly (99% removed in 23 hours), while  $\text{H}_2\text{O}_2$  in the positive control with deionized water was very stable.  $\text{H}_2\text{O}_2$  concentrations in sodium hydroxide and sodium bicarbonate were relatively stable, with 9 and 28% removals in 23 hours.

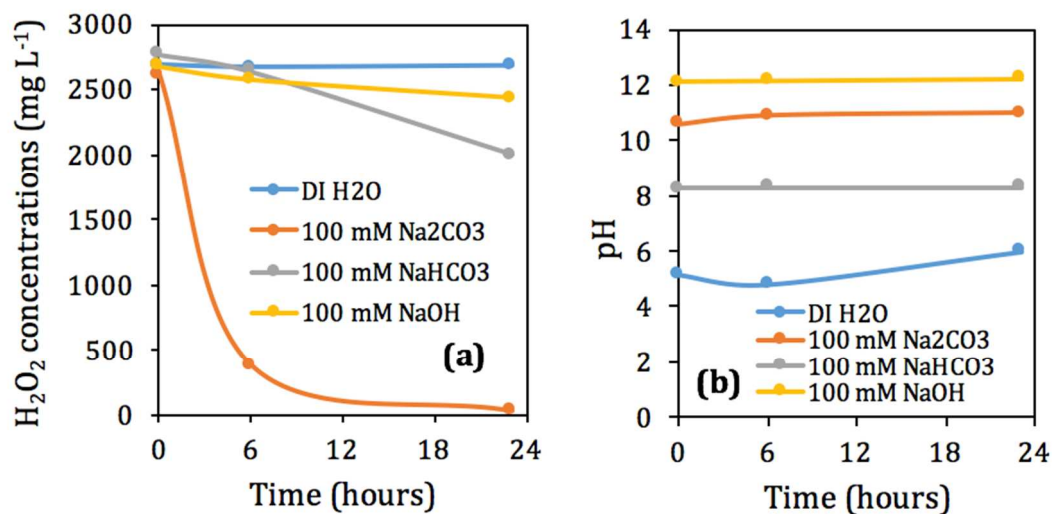

**Figure S5.**  $\text{H}_2\text{O}_2$  decay with time in different solutions: 100 mM sodium carbonate, sodium bicarbonate, and sodium hydroxide. (a)  $\text{H}_2\text{O}_2$  concentration and (b) pH.

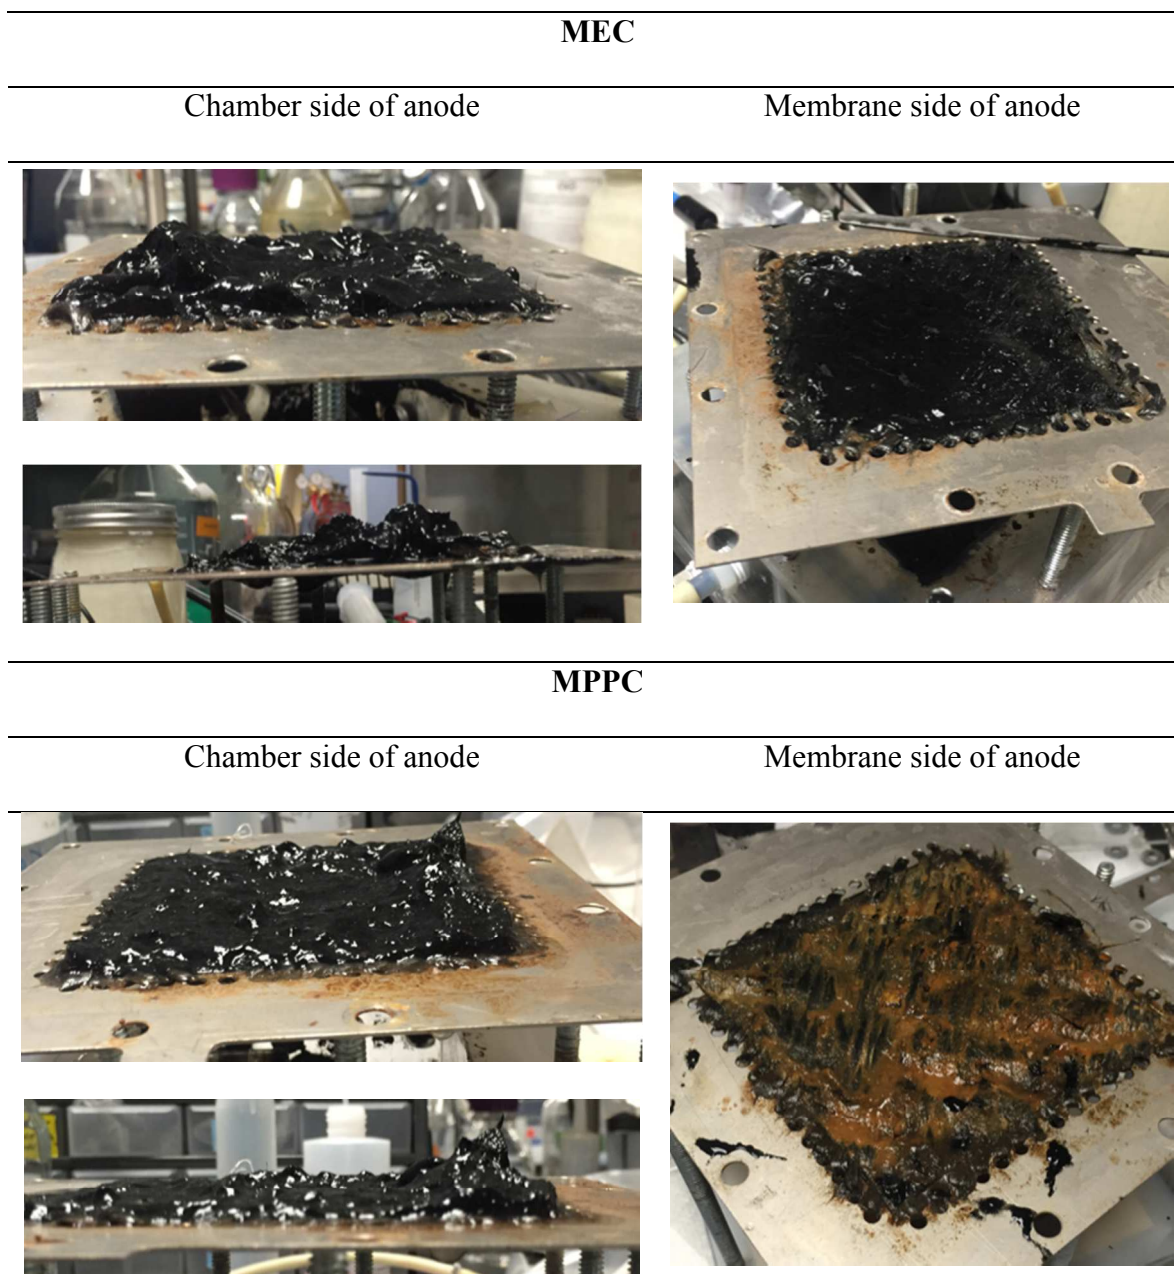

**Figure S6.** Comparisons of solid biomass on carbon fiber anodes towards chamber and membrane after MEC (top) and MPPC (bottom) operation



**Table S2.** A summary of H<sub>2</sub>O<sub>2</sub>-producing microbial electrochemical cell studies using real wastewater

| Source                   | Anolyte                 | Anode HRT   | Membrane type | Catholyte       | Maximum H <sub>2</sub> O <sub>2</sub> conc. (wt %) | Maximum current & voltage applied | Energy input (kWh/kg H <sub>2</sub> O <sub>2</sub> ) | PPE (%)* |
|--------------------------|-------------------------|-------------|---------------|-----------------|----------------------------------------------------|-----------------------------------|------------------------------------------------------|----------|
| Arends et al. (2014)     | Wetland effluent        | Batch       | AEM           | 50 mM NaCl      | 0.056%                                             | 10 A/m <sup>2</sup> at 0.6 V      | 2.5                                                  | ~40      |
| Modin & Fukushima (2012) | Domestic wastewater     | 6 min HRT   | CEM           | 50 mM NaCl      | 0.008%                                             | 0.2 A/m <sup>2</sup> at 0.6 V     | 18.2                                                 | 4.8      |
| Modin & Fukushima (2013) | Domestic wastewater     | 15 min HRT  | CEM           | 50 mM NaCl      | 0.23%                                              | 0.5 A/m <sup>2</sup> at 1 V       | 8.3                                                  | 37-66    |
| Sim et al. (2015)        | Raw domestic wastewater | 2-10 hr HRT | CEM           | Deionized water | 0.001%                                             | 0.56 A/m <sup>2</sup> at 12 V     | 78                                                   | ~10-70   |
| This study               | Primary sludge          | 9 day HRT   | AEM           | 50 mM NaOH      | 0.023%                                             | 1 A/m <sup>2</sup> at 0.2 V       | 0.87                                                 | 4-72     |

\* PPE: H<sub>2</sub>O<sub>2</sub> production efficiency
